# Supplementary material for: Autophagy-Related Gene 4 Participates in the Asexual Development, Stress Response and Virulence of Filamentous Insect Pathogenic Fungus Beauveria bassiana
Source: MDPI journal article supplement (doi:10.3390/jof9050543), 2023-05-06
Supplement: s1 [file s1]

**Table S1. Primers used in this study.**

| Primers | Paired sequences (5'–3')*                               | Purpose                                         |
|---------|---------------------------------------------------------|-------------------------------------------------|
| P1      | <u>CGAGCTGTACAAGTAACCCGGGCCA</u> ACATTCCAT<br>CGTCCTC   | Amplifying 5'-<br>fragment of <i>BbATG4</i>     |
| P2      | TTGGCTGCAGGTCGACGGATCCCTGCTCGTTGTC<br>TGTAAGTGC         |                                                 |
| P3      | <u>CGACCCATGGCTCGAGTCTAGAGT</u> GATGATGATA<br>TGGAGGATT | Amplifying 3'-<br>fragment of <i>BbATG4</i>     |
| P4      | GGTGGTGGTGGCTAGCGTTAACTGAGTCGGAGGT<br>GGAAAT            |                                                 |
| P5      | <u>ACAGTACACGAGGACTTCTAGACCA</u> ACATTCCAT<br>CGTCCTC   | Amplifying <i>BbATG4</i><br>for complementation |
| P6      | <u>GCCCTGCCCCTGAGAGGAATTCTG</u> AGTCGGAGGT<br>GGAAAT    |                                                 |
| P7      | CTCTGGAGCAAACGGGTAA                                     | PCR screening                                   |
| P8      | ACATTTCTGCGGTCTACTCTGC                                  |                                                 |

\*: The underlined sequence is required for recombination in preparing plasmid.
