# Supplementary material for: Autophagy-Related Gene 4 Participates in the Asexual Development, Stress Response and Virulence of Filamentous Insect Pathogenic Fungus Beauveria bassiana
Source: MDPI journal article supplement (doi:10.3390/jof9050543), 2023-05-06

**Figure S1. Gene disruption and complementation in *B. bassiana*.** (A) Diagram for plasmid construction. The upstream and downstream flanking sequences of target gene are amplified by primer pair P1/P2 and P3/P4, respectively. The resultant fragments are fused to cassette of *bar* gene, and then is then connected with *GFP* cassette in disruption vector. To complement the gene loss, the full length of *BbATG4* was amplified with primer pair P5/P6 and cloned into a plasmid with *Nat* cassette. All fungal transformants were screened by PCR with the primer pair P7/P8. GFP: green fluorescent protein. (B) PCR reaction to screen the gene disruption and complemented mutants. Lane1: wild type, lane 2: disruption mutant, lane 3: complemented strain, lane M: DNA marker.

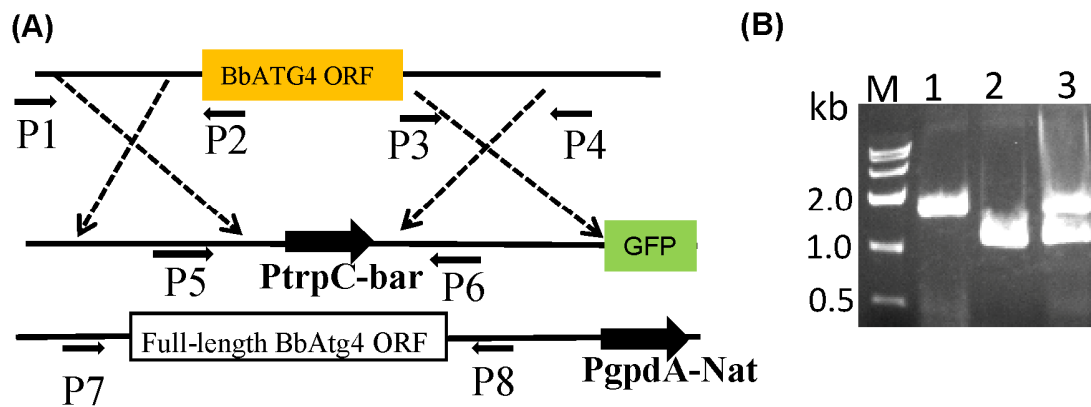

Supplement: s1 [file s1]
